# Supplementary material for: Interaction effects of significant risk factors on overweight or obesity among 7222 preschool–aged children from Beijing
Source: publisher site journal article supplement (doi:10.18632/aging.103701), 2020-08-03
Supplement: Supplementary file [file aging-v12i15-103701-supplementary-material-SD1.pdf]

## SUPPLEMENTARY FIGURE

### Under the China criteria:

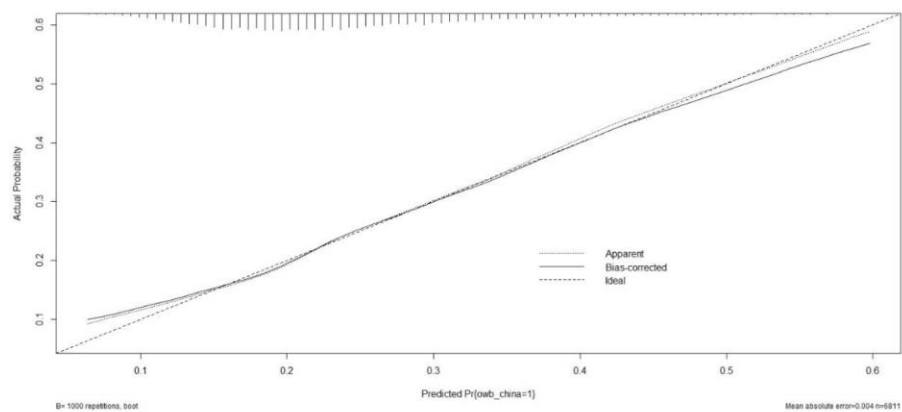

### Under the WHO criteria:

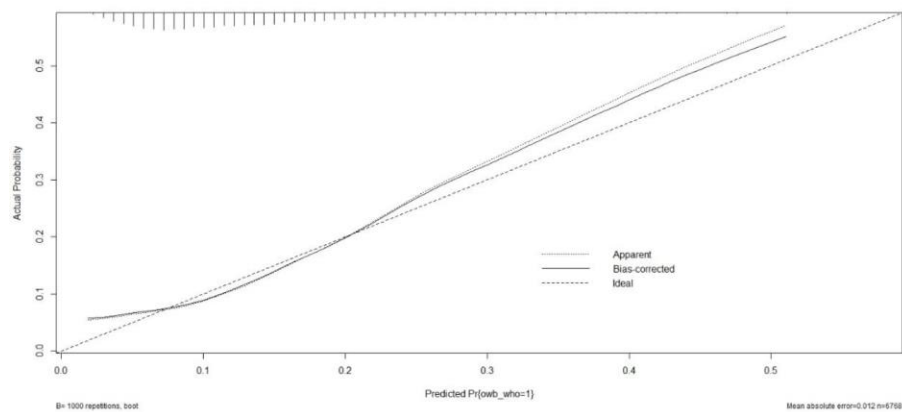

### Under the IOTF criteria:

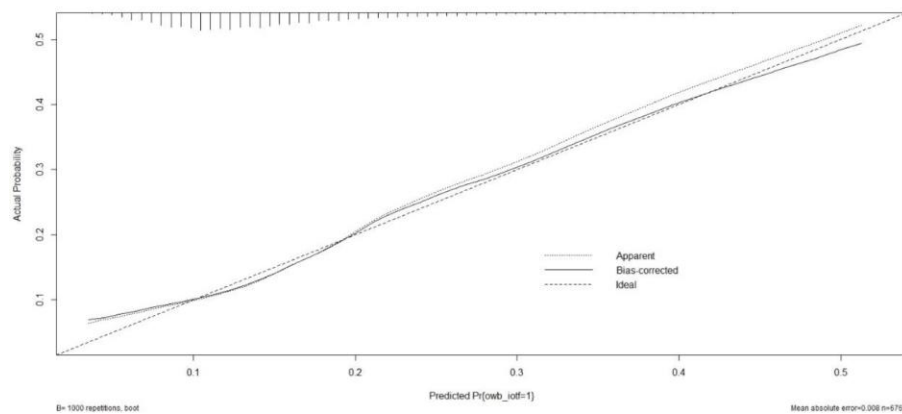

Supplementary Figure 1. The calibration curve for each nomogram model under three different growth criteria.
